# Supplementary material for: Effect of EG00229 on Radiation Resistance of Lung Adenocarcinoma Cells
Source: PubMed Central journal article supplement (PMC8425201; doi:10.7150/jca.56123), 2021-08-24
Supplement: jcav12p6105s1.pdf [file jcav12p6105s1.pdf]

|                  | Forward                        | Reverse                        |
|------------------|--------------------------------|--------------------------------|
| NRP1             | 5'-CAGGTGATGACTTCCAGCTCA-3'    | 5'-CCCAGTGGCAGAAGGTCTTG-3'     |
| GAPDH            | 5'-GAAGGTGAAGGTCGGAGTC-3'      | 5'-GAGATGGTGATGGGATTTTC-3'     |
| N-cadherin       | 5'-AGCGCAGICTTACCGAAGG-3'      | 5'-TCGCIGCTTTCATACIGAACITT-3'  |
| Vimentin         | 5'-TTTCTCCACGCCTCCAGTT-3'      | 5'-ATGCTTCGGCCAGGTTGT-3'       |
| $\beta$ -catenin | 5'-GGCAGGTCATCACCATCGG-3'      | 5'-CGTGTGGCGTAGAGGTCITT-3'     |
| $\alpha$ -SMA    | 5'-GTGCTGTCCCTCTATGCCTCTGG-3'  | 5'-GGCACGTTGTGAGTCACACCATC-3'  |
| IL-6             | 5'-CGGACAGCTTGAACAGAATGT-3'    | 5'-ACCATCCCCTCACACCTCA-3'      |
| STAT3            | 5'-CAGCAGCTTGACACACGGTA-3'     | 5'-AAACACCAAAGTGGCATGTGA-3'    |
| SDF-1            | 5'-TATTACTGGGACTGTGCTCAGAGA-3' | 5'-TGATCAGGCTACAGAAATGAGAAG-3' |
| CXCR4            | 5'-TGTCATCT ACACAGTCAACCTC-3'  | 5'-CAACATAGACCACCTTTTCAGC-3'   |
| PI3K             | 5'-CATCACTTCCTCCTGCTCTAT-3'    | 5'-GCCAGGGACACCTCCATCTC-3'     |
| AKT              | 5'-AGCGACGTGGCTATTGTGAAG-3'    | 5'-GCCATATTCTTGAGGAGGAAGT-3'   |
| m-TOR            | 5'-AGAAACTGCACGTCAGCACCA-3'    | 5'-CCATCCAGCCAGTCATCITTG-3'    |
